# Supplementary material for: Older patients (aged ≥60 years) with previously untreated advanced-stage classical Hodgkin lymphoma: a detailed analysis from the phase III ECHELON-1 study
Source: PubMed Central journal article supplement — Haematologica. 2021 Jun 24;107(5):1086–94. doi: 10.3324/haematol.2021.278438 (PMC9052913; doi:10.3324/haematol.2021.278438), 2021-06-24
Supplement: 2021_278438_EVENS_SUPPL.pdf [file 2021_278438_EVENS_SUPPL.pdf]

## Older patients (aged $\geq 60$ years) with previously untreated advanced-stage classical Hodgkin lymphoma: a detailed analysis from the phase III ECHELON-1 study

Andrew M. Evens,<sup>1</sup> Joseph M. Connors,<sup>2</sup> Anas Younes,<sup>3\*</sup> Stephen M. Ansell,<sup>4</sup> Won Seog Kim,<sup>5</sup> John Radford,<sup>6</sup> Tatyana Feldman,<sup>7</sup> Joseph Tuscano,<sup>8</sup> Kerry J. Savage,<sup>2</sup> Yasuhiro Oki,<sup>9</sup> Andrew Grigg,<sup>10</sup> Christopher Pocock,<sup>11</sup> Monika Dlugosz-Danecka,<sup>12</sup> Keenan Fenton,<sup>13</sup> Andres Forero-Torres,<sup>13</sup> Rachael Liu,<sup>14</sup> Hina Jolin,<sup>14</sup> Ashish Gautam<sup>14</sup> and Andrea Gallamini<sup>15</sup>

<sup>1</sup>Division of Blood Disorders, Rutgers Cancer Institute of New Jersey, New Brunswick, NJ, USA; <sup>2</sup>BC Cancer Center for Lymphoid Cancer and Department of Medical Oncology, Vancouver, BC, Canada; <sup>3</sup>Memorial Sloan Kettering Cancer Center, New York, NY, USA; <sup>4</sup>Mayo Clinic, Rochester, NY, USA; <sup>5</sup>Sungkyunkwan University School of Medicine, Samsung Medical Center, Seoul, South Korea; <sup>6</sup>University of Manchester and the Christie NHS Foundation Trust Manchester Academic Health Science Center, Manchester, UK; <sup>7</sup>John Theurer Cancer Center, Hackensack, NJ, USA; <sup>8</sup>UC Davis Cancer Center, Sacramento, CA, USA; <sup>9</sup>Genentech, South San Francisco, CA, USA; <sup>10</sup>Olivia Newton-John Cancer Wellness and Research Center, Austin Health and Department of Clinical Haematology, Austin Hospital, Heidelberg, Australia; <sup>11</sup>Haematology, East Kent Hospitals, Canterbury, UK; <sup>12</sup>Maria Sklodowska-Curie National Research Institute of Oncology, Krakow, Poland; <sup>13</sup>Seagen Inc., Bothell, WA, USA; <sup>14</sup>Millennium Pharmaceuticals, Inc., Cambridge, MA, USA, a wholly owned subsidiary of Takeda Pharmaceutical Company Limited and <sup>15</sup>Research and Innovation Department, A. Lacassagne Cancer Center, Nice, France

\*Current affiliation: Haematology (Early and Late Stage) Oncology R&D, AstraZeneca, New York, NY, USA

©2022 Ferrata Storti Foundation. This is an open-access paper. doi:10.3324/haematol.2021.278438

Received: February 1, 2021.

Accepted: June 17, 2021.

Pre-published: June 24, 2021.

Correspondence: ANDREW M. EVENS - ae378@cinj.rutgers.edu

---

## Supplementary material

Table S1. Summary of responses.

|                                                      | Aged ≥60 years<br>(n=186) |                 | Aged <60 years<br>(n=1,148) |                 | ITT population<br>(N=1,334) <sup>†</sup> |                 |
|------------------------------------------------------|---------------------------|-----------------|-----------------------------|-----------------|------------------------------------------|-----------------|
|                                                      | A+AVD<br>(n=84)           | ABVD<br>(n=102) | A+AVD<br>(n=580)            | ABVD<br>(n=568) | A+AVD<br>(n=664)                         | ABVD<br>(n=670) |
| CR at end of randomized regimen,* n (%)              | 51 (61)                   | 62 (61)         | 437 (75)                    | 410 (72)        | 488 (73)                                 | 472 (70)        |
| Difference (95% CI) <sup>†</sup>                     | -0.1 (-14.5–14.3)         |                 | 3.2 (-2.6–9.0)              |                 | 3.0 (-2.3–8.4)                           |                 |
| ORR at end of randomized regimen, <sup>‡</sup> n (%) | 59 (70)                   | 76 (75)         | 510 (88)                    | 477 (84)        | 569 (86)                                 | 553 (83)        |
| Difference (95% CI) <sup>†</sup>                     | -4.3 (-18.6–10.2)         |                 | 4.0 (-1.9–9.7)              |                 | 3.2 (-2.2–8.6)                           |                 |
| CR at end of frontline regimen, <sup>§</sup> n (%)   | 50 (60)                   | 62 (61)         | 438 (76)                    | 412 (73)        | 488 (73)                                 | 474 (71)        |
| Difference (95% CI) <sup>†</sup>                     | -1.3 (-15.6–13.1)         |                 | 3.0 (-2.8–8.8)              |                 | 2.7 (-2.6–8.1)                           |                 |
| CR at cycle 2, n (%)                                 | 50 (60)                   | 66 (65)         | 408 (70)                    | 385 (68)        | 458 (69)                                 | 451 (67)        |
| Difference (95% CI) <sup>†</sup>                     | -5.2 (-19.5–9.3)          |                 | 2.6 (-3.3–8.3)              |                 | 1.7 (-3.7–7.1)                           |                 |
| PET-negative at cycle 2, <sup>¶</sup> n (%)          | 67 (80)                   | 84 (82)         | 521 (90)                    | 493 (87)        | 588 (89)                                 | 577 (86)        |

|                                                 |                   |         |                 |          |                 |          |
|-------------------------------------------------|-------------------|---------|-----------------|----------|-----------------|----------|
| Difference (95% CI) <sup>†</sup>                | -2.6 (-17.0–11.9) |         | 3.0 (-2.8–8.8)  |          | 2.4 (-2.9–7.8)  |          |
| <b>Deauville score<sup>#</sup></b>              |                   |         |                 |          |                 |          |
| ≤3 after completion of frontline therapy, n (%) | 60 (71)           | 75 (74) | 510 (88)        | 476 (84) | 570 (86)        | 551 (82) |
| Difference (95% CI) <sup>†</sup>                | -2.1 (-16.5–12.3) |         | 4.1 (-1.7–9.9)  |          | 3.6 (-1.8–9.0)  |          |
| ≤2 after completion of frontline therapy, n (%) | 60 (71)           | 73 (72) | 503 (87)        | 464 (82) | 563 (85)        | 537 (80) |
| Difference (95% CI) <sup>†</sup>                | -0.1 (-14.5–14.3) |         | 5.0 (-0.8–10.8) |          | 4.6 (-0.8–10.0) |          |

Abbreviations: A+AVD: brentuximab vedotin plus doxorubicin, vinblastine, and dacarbazine; ABVD: doxorubicin, bleomycin, vinblastine, and dacarbazine; CI: confidence intervals; CR: complete response; ITT: intention-to-treat; IRF: independent review facility; ORR: overall response rate; PR: partial response. \*CR at the end of the randomized regimen was defined as the proportion of patients with a CR at the end of treatment with either regimen (A+AVD or ABVD), as determined by an IRF assessment. <sup>†</sup>CI were calculated from the exact CI, have not been adjusted for the multiple comparisons, and should not be used for definitive comparisons. <sup>‡</sup>ORR at the end of the randomized regimen was defined as the proportion of patients with a CR or PR at the end of treatment with either regimen (A+AVD or ABVD), as determined by an IRF assessment. <sup>§</sup>CR at the end of frontline therapy was defined as the proportion of patients with a CR after completion of either the randomized regimen (A+AVD or ABVD) or alternate frontline therapy, as determined by an IRF assessment. <sup>¶</sup>PET negativity rate at cycle 2 was defined as the proportion of patients with negative cycle 2 PET results defined as a Deauville score of ≤3 at cycle 2. <sup>#</sup>The Deauville score is a 5-point scale on which higher scores indicate greater uptake of <sup>18</sup>F-fluorodeoxyglucose at involved sites on PET. A score of 1 indicates no uptake, a score of 2 indicates uptake at an initial site that is less than or equal to the uptake at the mediastinum, a score of 3 indicates uptake at an initial site that is greater than uptake at the mediastinum but less than or equal to uptake at the liver, a score of 4 indicates uptake at an initial site that is moderately increased as compared with uptake at the liver, and a score of 5 indicates markedly increased uptake at any site or uptake at a new site of disease. The absence of a CR at the end of primary chemotherapy was defined as a Deauville score of 3, 4, or 5.

**Table S2. Five-year progression-free survival per investigator in the two treatment arms by PET2 status and age.**

| <b>60-month PFS* per INV,<br/>% (95% CI)</b> | <b>A+AVD</b>              | <b>ABVD</b>               | <b>HR (95% CI)<br/>P-value</b> |
|----------------------------------------------|---------------------------|---------------------------|--------------------------------|
| ITT population                               | n=664<br>82.2 (79.0–85.0) | n=670<br>75.3 (71.7–78.5) | 0.681 (0.53–0.87)<br>0.0017    |
| PET2-negative                                | n=588<br>84.9 (81.7–87.6) | n=578<br>78.9 (75.2–82.1) | 0.663 (0.50–0.88)<br>0.004     |
| PET2-positive                                | n=47<br>60.6 (45.0–73.1)  | n=58<br>45.9 (32.7–58.2)  | 0.702 (0.39–1.26)<br>0.229     |
| Aged ≥60 years                               | n=84<br>67.1 (55.1–76.5)  | n=102<br>61.6 (50.9–70.7) | 0.820 (0.49–1.36)<br>0.443     |
| PET2-negative                                | n=67<br>71.9 (59.0–81.3)  | n=85<br>64.9 (53.5–74.2)  | 0.720 (0.40–1.29)<br>0.268     |
| PET2-positive                                | n=5<br>40.0 (5.2–75.3)    | n=8<br>25.0 (3.7–55.8)    | 0.923 (0.23–3.72)<br>0.910     |
| Aged <60 years                               | n=580<br>84.3 (81.0–87.1) | n=568<br>77.8 (74.0–81.1) | 0.665 (0.51–0.88)<br>0.003     |
| PET2-negative                                | n=521<br>86.6 (83.3–89.3) | n=493<br>81.5 (77.7–84.7) | 0.675 (0.49–0.93)<br>0.014     |
| PET2-positive                                | n=42<br>63.1 (46.4–75.9)  | n=50<br>49.3 (34.7–62.3)  | 0.702 (0.37–1.33)<br>0.274     |

Abbreviations: A+AVD: brentuximab vedotin plus doxorubicin, vinblastine, and dacarbazine; ABVD: doxorubicin, bleomycin, vinblastine, and dacarbazine; CI: confidence interval; INV: investigator; ITT: intention-to-treat; PET2, positron emission tomography status after cycle 2; PFS: progression-free survival. \*5-year PFS per INV based on a median of 60.9 months extended follow-up.

**Table S3. Mean relative dose intensity in patients aged  $\geq 60$  years.**

| <b>Patients aged <math>\geq 60</math> years</b> |                     |                    |
|-------------------------------------------------|---------------------|--------------------|
| <b>Mean RDI, % (SD)</b>                         | <b>A+AVD (n=83)</b> | <b>ABVD (n=98)</b> |
| Brentuximab vedotin                             | 92.3 (14.0)         | NA                 |
| Bleomycin                                       | NA                  | 88.7 (21.1)        |
| Doxorubicin                                     | 96.6 (7.7)          | 97.3 (7.1)         |
| Vinblastine                                     | 93.3 (13.6)         | 93.3 (14.8)        |
| Dacarbazine                                     | 97.9 (5.4)          | 95.9 (11.9)        |

Abbreviations: A+AVD: brentuximab vedotin plus doxorubicin, vinblastine, and dacarbazine; ABVD: doxorubicin, bleomycin, vinblastine, and dacarbazine; NA: not applicable; RDI: relative dose intensity; SD: standard deviation.

**Table S4. Cause of death in patients aged ≥60 years.**

| Age (years)/<br>gender  | Cycle day of<br>last dose | Days from<br>first dose | Days from<br>last dose | Cause of<br>death*                                     | Disease<br>related?† | Treatment<br>related? |
|-------------------------|---------------------------|-------------------------|------------------------|--------------------------------------------------------|----------------------|-----------------------|
| <b>A+AVD (n=83)</b>     |                           |                         |                        |                                                        |                      |                       |
| <i>On-study deaths‡</i> |                           |                         |                        |                                                        |                      |                       |
| 62/F                    | C1D1                      | 12                      | 12                     | AE (histiocytosis<br>hematophagic)                     | Yes                  | Yes                   |
| 73/M                    | C1D15                     | 41                      | 25                     | AE (multiple organ<br>dysfunction)                     | No                   | Yes                   |
| 79/M                    | C1D1                      | 3                       | 3                      | AE (myocardial infarction)                             | Yes                  | No                    |
| <b>ABVD (n=98)</b>      |                           |                         |                        |                                                        |                      |                       |
| <i>On-study deaths‡</i> |                           |                         |                        |                                                        |                      |                       |
| 61/M                    | C5D15                     | 168                     | 19                     | AE (pneumonia)                                         | No                   | No                    |
| 63/M                    | C6D15                     | 200                     | 25                     | AE (cardiac arrest)                                    | No                   | No                    |
| 78/F                    | C3D15                     | 109                     | 29                     | AE (pulmonary toxicity –<br>interstitial lung disease) | No                   | Yes                   |
| 80/M                    | C3D1                      | 83                      | 27                     | AE (respiratory disorder)                              | No                   | Yes                   |
| 83/F                    | C5D15                     | 160                     | 21                     | AE (pneumonia)                                         | Yes                  | Yes                   |

Abbreviations: A+AVD: brentuximab vedotin plus doxorubicin, vinblastine, and dacarbazine; ABVD: doxorubicin, bleomycin, vinblastine, and dacarbazine; AE: adverse event; C: cycle; D: day; F: female; M: male. \*AE are described by their Medical Dictionary for Regulatory Activities (MedDRA) preferred term. †Related to the disease under study or complications thereof. ‡On-study deaths were defined as deaths that occurred within 30 days of the last dose of frontline therapy.

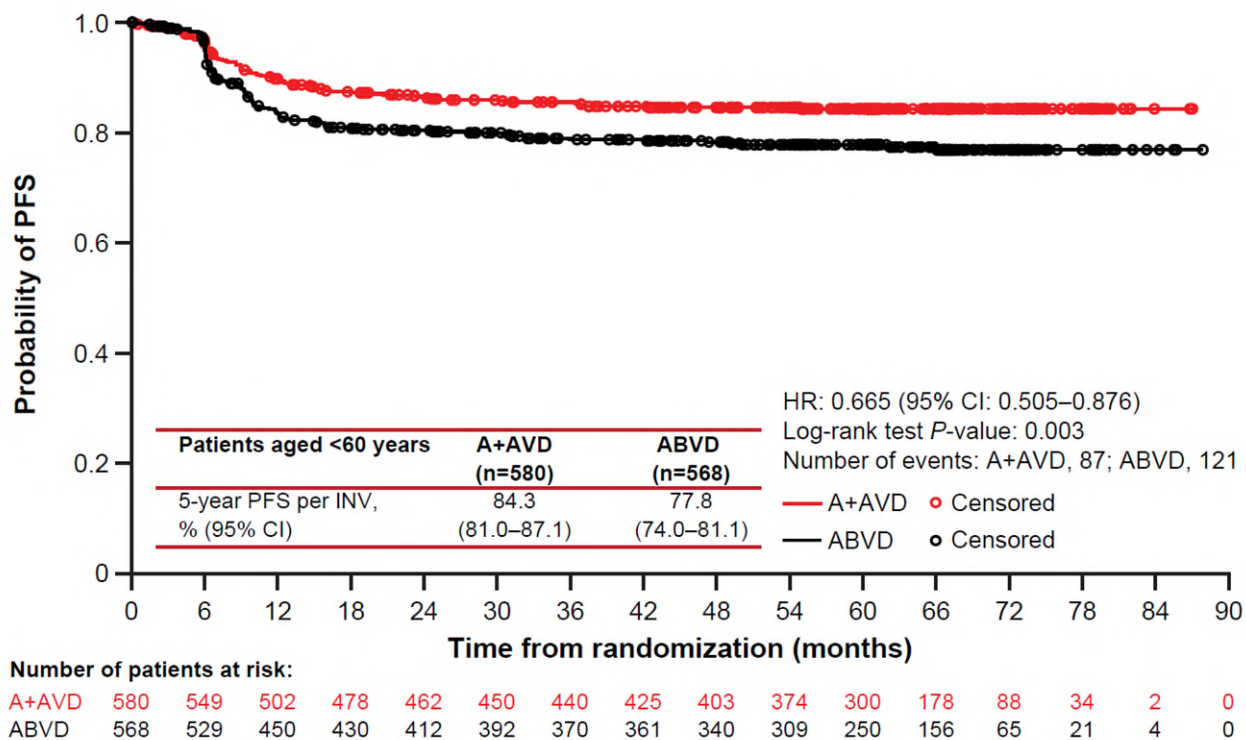

**Figure S1. Progression-free survival (PFS) per independent review facility (IRF) in patients aged <60 years.**

Abbreviations: A+AVD: brentuximab vedotin plus doxorubicin, vinblastine, and dacarbazine; ABVD: doxorubicin, bleomycin, vinblastine, and dacarbazine; CI: confidence interval; HR: hazard ratio; INV: investigator; IRF: independent review facility; PFS: progression-free survival.



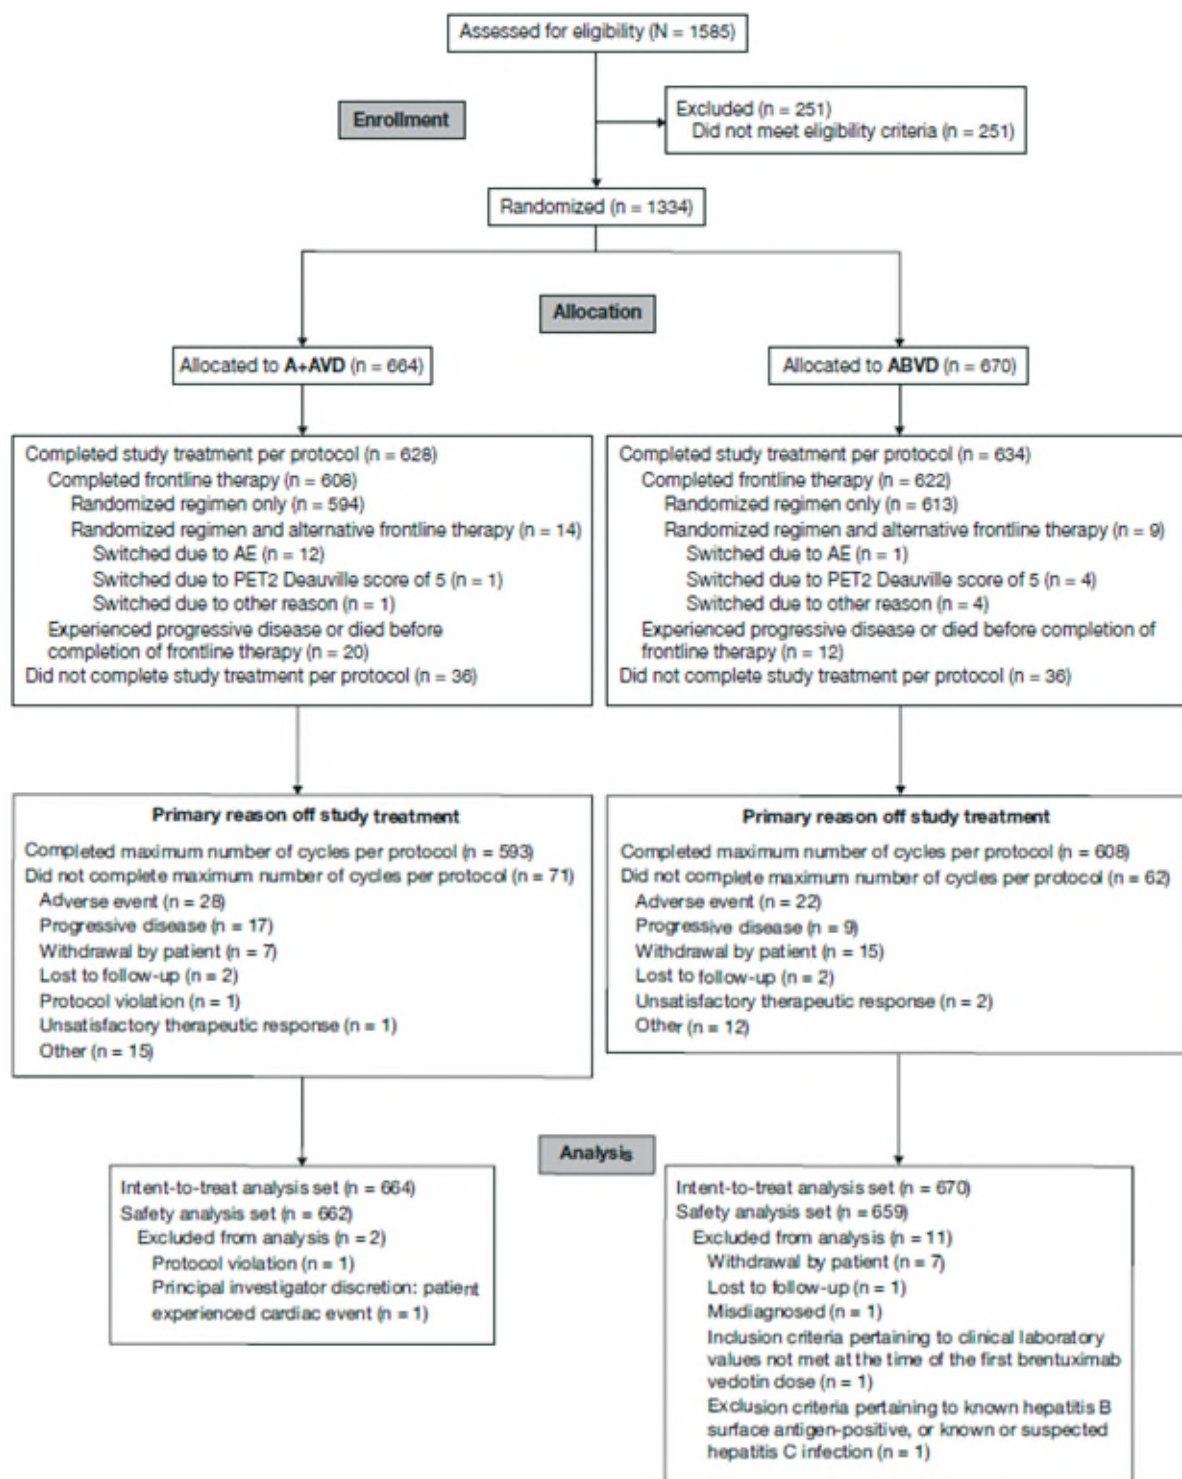

### ECHELON-1 CONSORT diagram.

Abbreviations: A+AVD: brentuximab vedotin plus doxorubicin, vinblastine, dacarbazine; ABVD: doxorubicin, bleomycin, vinblastine, dacarbazine; AE: adverse event; PET2: end-of-cycle-2 positron-emission tomography.

## References

1. Connors JM, Jurczak W, Straus DJ, Ansell SM, Kim WS, Gallamini A, et al. Brentuximab vedotin with chemotherapy for stage III or IV Hodgkin's lymphoma. *N Engl J Med*. 2018;378(4):331–344.
